# Supplementary material
Source: Springer Nature journal article supplement (https://mijn.bsl.nl/resource/supplementary/13047_2008_87_MOESM5_ESM.pdf/7109568)

**Air samples**

**Meat 1**

1 mln

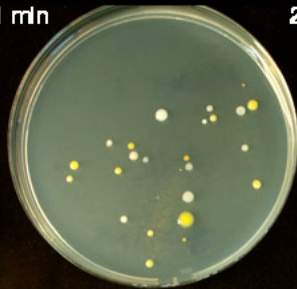

2 mln

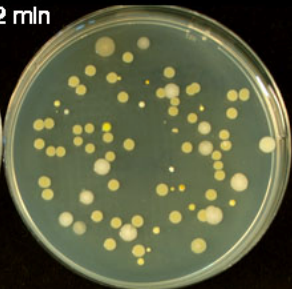

3 mln

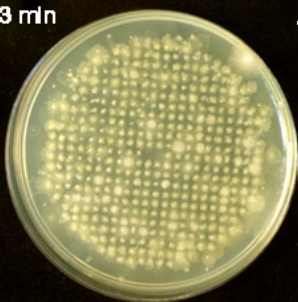

4 mln

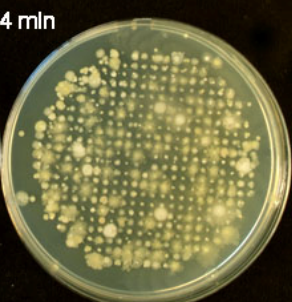

Supplement: MOESM5 [file 7109568]
